# Supplementary material for: Predicting the multi-modal binding propensity of small molecules: towards an understanding of drug promiscuity
Source: Royal Society of Chemistry journal article supplement (doi:10.1039/b901356c), 2009-05-28
Supplement: b901356c.pdf [file b901356c.pdf]

**Supp1. The list of 57 global descriptors**

2D van der Waals surface area

2D van der Waals volume

2D van der Waals surface area of H-bond acceptor atoms

2D van der Waals surface area of H-bond donor atoms

2D van der Waals surface area of all H-bond atoms

2D van der Waals hydrophobic surface area

2D van der Waals surface area of negative chargable group

2D van der Waals surface area of positive chargable group

2D van der Waals surface area of polar group

Calculated logP

Calculated molecular refractivity

Calculated buffer solubility

Charge\_polarization

Formal\_charge

Fraction of 2D van der Waals surface area of chargable groups

Fraction of 2D van der Waals surface area of H-bond acceptor groups

Fraction of 2D van der Waals surface area of H-bond donor groups

Fraction of 2D van der Waals hydrophobic surface area

Fraction of 2D van der Waals surface area of negative chargable groups

Fraction of 2D van der Waals surface area of polar groups

Fraction of 2D van der Waals surface area of positive chargable groups

Fraction of aromatic atoms

Fraction of hetero atoms

Fraction of rotatable bonds

Hydrophobic surface area (The sum of van der Waals surface area with absolute values of MPEOE charges less than 0.2)

Local dipole index (the average of the charge differences over all bonded atom pairs)

Molecular weight

Negative charged polar surface area (The sum of van der Waals surface area with values of MPEOE charges less than 0.2)

Number of aromatic bonds

Number of aromatic rings

Number of H-bond acceptors

Number of H-bond donors

Number of N

Number of negative chargable groups  
Number of negative charged groups  
Number of O  
Number of P  
Number of positive chargable groups  
Number of positive charged groups  
Number of rigid bonds  
Number of rings  
Number of rotatable bonds  
Polarity parameter  
Polarizability (by Miller method)  
Positive charged polar surface area (The sum of van der Waals surface area with values of MPEOE charges greater than 0.2)  
Pure water solubility  
Maximum negative charge  
Maximum positive charge  
Ratio donors to acceptor (The number of hydrogen bond donors / The number of hydrogen bond acceptors)  
Relative negative charge (The partial charge of the most negative atom divided by the total negative charge)  
Relative positive charge (The partial charge of the most positive atom divided by the total negative charge)  
Calculated boiling point  
Calculated melting point  
Solvation free energy  
Total absolute atomic charge  
Total negative charge  
Total positive charge

**Supp2.** List of tested promiscuous drugs.

| Drug Name             | Pharmacological action from MeSH <sup>1</sup> |
|-----------------------|-----------------------------------------------|
| ZD6474 <sup>2,3</sup> | Not annotated                                 |
| SU6668 <sup>2</sup>   | Not annotated                                 |
| EKB569 <sup>3</sup>   | Not annotated                                 |

|                               |                                                                                                            |
|-------------------------------|------------------------------------------------------------------------------------------------------------|
| Imatinib <sup>3-6</sup>       | Antineoplastic Agents (Protein Kinase Inhibitors)                                                          |
| Sutent <sup>3,5</sup>         | Antineoplastic Agents (Angiogenesis Inhibitors)                                                            |
| Sorafenib <sup>3,5</sup>      | Antineoplastic Agents (Protein Kinase Inhibitors)                                                          |
| AG-013736 <sup>3</sup>        | Not annotated                                                                                              |
| Staurosporine <sup>3</sup>    | Enzyme Inhibitors                                                                                          |
| Aspirin <sup>6,7</sup>        | Anti-Inflammatory Agents, Fibrinolytic Agents, Platelet Aggregation Inhibitors (Cyclooxygenase Inhibitors) |
| Clozapine <sup>7-10</sup>     | Antipsychotic Agents (Serotonin Antagonists, GABA Antagonists)                                             |
| Aripiprazole <sup>8</sup>     | Antipsychotic Agents                                                                                       |
| Ziprasidone <sup>8</sup>      | Antipsychotic Agents (Serotonin Antagonists, Dopamine Antagonists)                                         |
| Zotepine <sup>8</sup>         | Antipsychotic Agents                                                                                       |
| Quetiapine <sup>8</sup>       | Antipsychotic Agents                                                                                       |
| Olanzapine <sup>8</sup>       | Antiemetics, Antipsychotic Agents (Serotonin Uptake Inhibitors)                                            |
| Risperidone <sup>8</sup>      | Antipsychotic Agents (Serotonin Antagonists, Dopamine Antagonists)                                         |
| Haloperidol <sup>8</sup>      | Antiemetics, Antipsychotic Agents (Dopamine Antagonists), Anti-Dyskinesia Agents                           |
| Chlorpromazine <sup>8</sup>   | Antiemetics, Antipsychotic Agents (Dopamine Antagonists)                                                   |
| Imipramine <sup>8</sup>       | Antidepressive Agents (Tricyclic Adrenergic Uptake Inhibitors)                                             |
| Agomelatine <sup>8</sup>      | Hypnotics and Sedatives                                                                                    |
| Clotrimazole <sup>11</sup>    | Anti-Infective Agents, Local Antifungal Agents                                                             |
| Benzyl Benzoate <sup>11</sup> | Insecticides                                                                                               |
| Nicardipine <sup>11</sup>     | Antihypertensive Agents (Calcium Channel Blockers), Vasodilator Agents                                     |
| Delavirdine <sup>11</sup>     | Anti-HIV Agents (Reverse Transcriptase Inhibitors)                                                         |

|                               |                                                                                                                  |
|-------------------------------|------------------------------------------------------------------------------------------------------------------|
| Chlorambucil <sup>11</sup>    | Antineoplastic Agents (Alkylating)                                                                               |
| Sulfinpyrazone <sup>11</sup>  | Uricosuric Agents                                                                                                |
| Indomethacin <sup>11</sup>    | Anti-Inflammatory Agents, Cardiovascular Agents, Gout Suppressants, Tocolytic Agents (Cyclooxygenase Inhibitors) |
| Tacrine <sup>11</sup>         | Cholinesterase Inhibitors, Parasympathomimetics Nootropic Agents                                                 |
| Phenazopyridine <sup>11</sup> | Local Anesthetics                                                                                                |
| SP600125 <sup>3</sup>         | Not annotated                                                                                                    |

**Supp3.** List of tested H1-antihistaminergic drugs.

| Generation     | Drugs                                                                                                                                                                                                                                                                                                                                                                                        |
|----------------|----------------------------------------------------------------------------------------------------------------------------------------------------------------------------------------------------------------------------------------------------------------------------------------------------------------------------------------------------------------------------------------------|
| 1st generation | <ul style="list-style-type: none"> <li>* Ethylenediamine class: Diphenhydramine, Carbinoxamine, Doxylamine, Clemastine, Dimenhydrinate</li> <li>* Alkylamine class: Chlorphenamine, Brompheniramine</li> <li>* Piperazine class: Cyclizine, Hydrixyzine, Meclizine</li> <li>* Tricyclics and Tetracyclics class: Promethazine, Alimemazine, Cyprohepatadine, Azatadine, Ketotifen</li> </ul> |
| 2nd generation | Acrivastine, Cetirizine, Loratadine, Terfenadine, Azelastine, Levocabastine                                                                                                                                                                                                                                                                                                                  |
| 3rd generation | Desloratadine, Fexofenadine                                                                                                                                                                                                                                                                                                                                                                  |

1. C. E. Lipscomb, *Bull Med Libr Assoc*, 2000, **88**, 265-266.
2. C. L. Arteaga, *Clin Cancer Res*, 2003, **9**, 1231-1232.
3. M. A. Fabian, W. H. Biggs, 3rd, D. K. Treiber, C. E. Atteridge, M. D. Azimioara, M. G. Benedetti, T. A. Carter, P. Ciceri, P. T. Edeen, M. Floyd, J. M. Ford, M. Galvin, J. L. Gerlach, R. M. Grotzfeld, S. Herrgard, D. E. Insko, M. A. Insko, A. G. Lai, J. M. Lelias, S. A. Mehta, Z. V. Milanov, A. M. Velasco, L. M. Wodicka, H. K. Patel, P. P. Zarrinkar and D. J. Lockhart, *Nat Biotechnol*, 2005, **23**, 329-336.

4. T. Hampton, *Jama-J Am Med Assoc*, 2004, **292**, 419-+.
5. S. Frantz, *Nature*, 2005, **437**, 942-943.
6. S. K. Mencher and L. G. Wang, *BMC Clin Pharmacol*, 2005, **5**, 3.
7. A. L. Hopkins, J. S. Mason and J. P. Overington, *Curr Opin Struc Biol*, 2006, **16**, 127-136.
8. B. L. Roth, D. J. Sheffler and W. K. Kroeze, *Nat Rev Drug Discov*, 2004, **3**, 353-359.
9. C. G. Wermuth, *Drug Discov Today*, 2004, **9**, 826-827.
10. R. Morphy, C. Kay and Z. Rankovic, *Drug Discov Today*, 2004, **9**, 641-651.
11. J. Seidler, S. L. McGovern, T. N. Doman and B. K. Shoichet, *J Med Chem*, 2003, **46**, 4477-4486.
